# Supplementary material for: Awareness of security and privacy settings in video conferencing apps among faculty during the COVID-19 pandemic
Source: PubMed Central journal article supplement (PMC9299235; doi:10.7717/peerj-cs.1021), 2022-07-07
Supplement: peerj-cs-08-1021-s003.pdf [file peerj-cs-08-1021-s003.pdf]

| var    | description                                                                                                                                                                           | 0                                   | 1                                   | 2                           | 3                   | 4                  | 5 |
|--------|---------------------------------------------------------------------------------------------------------------------------------------------------------------------------------------|-------------------------------------|-------------------------------------|-----------------------------|---------------------|--------------------|---|
| gender | What is your gender?                                                                                                                                                                  | Male                                | Female                              |                             |                     |                    |   |
| age    | What is your age?                                                                                                                                                                     | 25 - 34                             | 35 - 44                             | 45 - 54                     | 55 - 64             |                    |   |
| edu    | What is your level of education?                                                                                                                                                      | Bachelor                            | Master                              | PhD                         |                     |                    |   |
| rank   | What's your Academic level/rank?                                                                                                                                                      | Teaching assistant                  | Lecturer                            | Assistant Professor         | Associate Professor | Full Professor     |   |
| exp    | How many years of teaching experience do you have?                                                                                                                                    | < 3 years                           | 3 to 9 years                        | 10 to 24 years              | 25 +                |                    |   |
| field  | What is your college area of specialization?                                                                                                                                          | Art, Humanities and Social Sciences | Science, Engineering and Technology | Medical and Health Sciences |                     |                    |   |
| att1   | Attitudes - I like using ICT for teaching or conducting research                                                                                                                      | Stongly Disagree                    | Disagree                            | Neutral                     | Agree               | Strongly Agree     |   |
| att2   | Attitudes - ICT makes teaching or conducting research more interesting                                                                                                                | Stongly Disagree                    | Disagree                            | Neutral                     | Agree               | Strongly Agree     |   |
| att3   | Attitudes - I am more motivated to teach or to conduct research with ICT                                                                                                              | Stongly Disagree                    | Disagree                            | Neutral                     | Agree               | Strongly Agree     |   |
| att4   | Attitudes - There is a lot of potential in the use of mobile technologies (e.g. smartphones, tablets) for teaching and research                                                       | Stongly Disagree                    | Disagree                            | Neutral                     | Agree               | Strongly Agree     |   |
| dl1    | Digital Literacy - I know how to solve my own technical problems.                                                                                                                     | Stongly Disagree                    | Disagree                            | Neutral                     | Agree               | Strongly Agree     |   |
| dl2    | Digital Literacy - I can learn new technologies easily.                                                                                                                               | Stongly Disagree                    | Disagree                            | Neutral                     | Agree               | Strongly Agree     |   |
| dl3    | Digital Literacy - I know about a lot of different technologies.                                                                                                                      | Stongly Disagree                    | Disagree                            | Neutral                     | Agree               | Strongly Agree     |   |
| dl4    | Digital Literacy - I am confident with my search and evaluate skills in regards to obtaining information from the Web                                                                 | Stongly Disagree                    | Disagree                            | Neutral                     | Agree               | Strongly Agree     |   |
| dl5    | Digital Literacy - I am familiar with issues related to web-based activities e.g. cyber safety, search issues, plagiarism                                                             | Stongly Disagree                    | Disagree                            | Neutral                     | Agree               | Strongly Agree     |   |
| dl6    | Digital Literacy - ICT enables me to collaborate better with their peers on project work and other learning activities                                                                | Stongly Disagree                    | Disagree                            | Neutral                     | Agree               | Strongly Agree     |   |
| dl7    | Digital Literacy - I frequently obtain help with my university work from my friends over the Internet e.g. through Email, Social Media, or Videoconference                            | Stongly Disagree                    | Disagree                            | Neutral                     | Agree               | Strongly Agree     |   |
| pc1    | Privacy Concerns - User online privacy is really a matter of users' right to exercise control and autonomy over decisions about how their information is collected, used, and shared. | Stongly Disagree                    | Disagree                            | Neutral                     | Agree               | Strongly Agree     |   |
| pc2    | Privacy Concerns - I believe that online privacy is invaded when control is lost or unwillingly reduced as a result of a marketing transaction.                                       | Stongly Disagree                    | Disagree                            | Neutral                     | Agree               | Strongly Agree     |   |
| pc3    | Privacy Concerns - Companies seeking information online should disclose the way the data are collected, processed, and used.                                                          | Stongly Disagree                    | Disagree                            | Neutral                     | Agree               | Strongly Agree     |   |
| pc4    | Privacy Concerns - It is very important to me that I am aware and knowledgeable about how my personal information will be used.                                                       | Stongly Disagree                    | Disagree                            | Neutral                     | Agree               | Strongly Agree     |   |
| pc5    | Privacy Concerns - When online companies ask me for personal information, I sometimes think twice before providing it.                                                                | Stongly Disagree                    | Disagree                            | Neutral                     | Agree               | Strongly Agree     |   |
| pc6    | Privacy Concerns - I'm concerned that online companies are collecting too much personal information about me.                                                                         | Stongly Disagree                    | Disagree                            | Neutral                     | Agree               | Strongly Agree     |   |
| sa1    | Security Awareness - Overall, I am aware of the potential security threats and their negative consequences.                                                                           | Stongly Disagree                    | Disagree                            | Neutral                     | Agree               | Strongly Agree     |   |
| sa2    | Security Awareness - I have sufficient knowledge about the cost of potential security problems.                                                                                       | Stongly Disagree                    | Disagree                            | Neutral                     | Agree               | Strongly Agree     |   |
| sa3    | Security Awareness - I understand the concerns regarding information security and the risks they pose in general.                                                                     | Stongly Disagree                    | Disagree                            | Neutral                     | Agree               | Strongly Agree     |   |
| sa4    | Security Awareness - I know the rules and regulations prescribed by the security policy of my university.                                                                             | Stongly Disagree                    | Disagree                            | Neutral                     | Agree               | Strongly Agree     |   |
| sa5    | Security Awareness - I understand the rules and regulations prescribed by the security policy of my university.                                                                       | Stongly Disagree                    | Disagree                            | Neutral                     | Agree               | Strongly Agree     |   |
| sa6    | Security Awareness - I know my responsibilities as prescribed in the security policy to enhance the information security of my university.                                            | Stongly Disagree                    | Disagree                            | Neutral                     | Agree               | Strongly Agree     |   |
| fam1   | How familiar are you with Blackboard Collaborate Ultra?                                                                                                                               | Not at all familiar                 | Slightly familiar                   | Moderately familiar         | Somewhat familiar   | Extremely familiar |   |
| fam2   | How much do you use Blackboard Collaborate Ultra?                                                                                                                                     | Never                               | Rarely                              | Occasionally                | A moderate amount   | A great deal       |   |
| toa    | Have you read the terms & agreement of Blackboard Collaborate Ultra?                                                                                                                  | No                                  | Yes                                 | Don't Remember              |                     |                    |   |
